# Supplementary material for: Genome Sequencing and Comparative Transcriptomics of the Model Entomopathogenic Fungi Metarhizium anisopliae and M. acridum
Source: PLOS journal article supplement (doi:10.1371/journal.pgen.1001264), 2011-01-06
Supplement: S8 (10.1371/journal.pgen.1001264.s008) [file journal.pgen.1001264.s008]

**Table S2** Sizes ofselected gene families in *Metarhizium* spp. and other Ascomycetes.

| **Protein family** | **MAA** | **MAC** | **EF** | **FG** | **MO** | **BC** | **SS** | **NC** | **AN** | **AF** |
| --- | --- | --- | --- | --- | --- | --- | --- | --- | --- | --- |
| Fungal specific transcription factors | 114 | 94 | 68 | 192 | 95 | 118 | 90 | 89 | 209 | 169 |
| C2H2 zinc finger transcription factors | 86 | 53 | 45 | 85 | 58 | 48 | 54 | 63 | 58 | 51 |
| Zn2/Cys6 transcription factors | 202 | 174 | 107 | 376 | 155 | 142 | 108 | 110 | 307 | 230 |
| Major facilitator superfamily | 269 | 236 | 121 | 274 | 198 | 225 | 167 | 110 | 279 | 232 |
| Cytochrome P450 | 123 | 100 | 57 | 112 | 137 | 129 | 93 | 40 | 116 | 74 |
| Pth11-like G-protein coupled receptor | 54 | 40 | 20 | 51 | 60 | 22 | 23 | 28 | 39 | 15 |
| Protein kinases | 151 | 183 | 158 | 129 | 129 | 124 | 164 | 111 | 127 | 131 |
| Histidine kinase | 10 | 9 | 13 | 20 | 6 | 3 | 5 | 8 | 12 | 6 |
| Heterokaryon incompatibility | 36 | 25 | 6 | 88 | 41 | 59 | 34 | 45 | 7 | 8 |
| Serine proteases | 83/182 | 60/154 | 38/109 | 60/150 | 56/91 | 19/34 | 20/33 | 32/74 | 53/136 | 29/46 |
| Subtilisin | 41/55 | 28/43 | 13/18 | 16/24 | 26/29 | 4/7 | 4/6 | 6/10 | 3/4 | 3/7 |
| Trypsin | 27/32 | 9/17 | 1/4 | 2/3 | 3/3 | 1/1 | 1/1 | 0/2 | 1/2 | 0/0 |
| Carboxypeptidase | 15/25 | 13/26 | 7/7 | 12/21 | 7/8 | 7/9 | 8/ 11 | 6/9 | 5/12 | 14/15 |
| Aspartic protease | 24/33 | 19/25 | 9/12 | 15/18 | 14/19 | 11/14 | 9/21 | 15/19 | 7/16 | 7/9 |
| Threonine protease | 4/23 | 3/21 | 1/21 | 3/18 | 2/18 | 2/13/ | 2/13 | 2/20 | 0/20 | 1/17 |
| Cysteine protease | 4/46 | 4/47 | 6/49 | 5/57 | 4/31 | 3/24 | 1/27 | 4/41 | 6/57 | 3/31 |
| Metalloprotease | 17/95 | 18/87 | 15/83 | 32/111 | 38/91 | 6/50 | 7/48/ | 21/81 | 22/105 | 20/77 |
| Lipase | 12/32 | 5/23 | 7/20 | 4/31 | 2/23 | 3/28 | 2/25 | 0/16 | 2/27 | 3/25 |
| Esterase/thioesterase | 66 | 61 | 59 | 70 | 64 | 70 | 58 | 42 | 63 | 52 |
| Glycoside hydrolase related | 156 | 140 | 73 | 159 | 198 | 120 | 126 | 137 | 200 | 165 |
| Secondary metabolite backbone genes | 61 | 42 | 46 | 37 | 32 | 37 | 29 | 15 | 58 | 40 |
| Transposases | 148 | 20 | 1 | 17 | 15 | 73 | 426 | 15 | 15 | 109 |
| Cutinase | 2 | 2 | 5 | 12 | 18 | 11 | 8 | 3 | 4 | 5 |
| Pectin lyase | 7 | 7 | 6 | 25 | 9 | 25 | 20 | 5 | 24 | 27 |

Note: Fungal species are MAA for *Metarhizium anisopliae*; MAC, *M. acridum*; EF, *Epichloë festucae*; FG, *Fusarium graminearum*; MO, *Magnaporthe oryzae*; BC, *Botrytis cinerea*; SS, *Sclerotinia sclerotiorum*; NC, *Neurospora crassa*; AN, *Aspergillus nidulans* and AF, *A. fumigatus*. Fractions indicate the number of total proteins in each family that are secreted. Transposases encoded within different classes of transposons were scored by repeatmasker analysis.
