# Supplementary material for: Genome Sequencing and Comparative Transcriptomics of the Model Entomopathogenic Fungi Metarhizium anisopliae and M. acridum
Source: PLOS journal article supplement (doi:10.1371/journal.pgen.1001264), 2011-01-06
Supplement: S10 (10.1371/journal.pgen.1001264.s010) [file journal.pgen.1001264.s010]

**Table S4** The numberof pseudogenes (by class) in the *Metarhizium anisopliae* and *M. acridum* genomes.

| **Pseudogene type** | ***M. anisopliae*** | ***M. acridum*** |
| --- | --- | --- |
| DUP | 129 | 254 |
| PSSD | 122 | 104 |
| FRAG | 112 | 82 |
| **Total** | **363** | **440** |

Note: DUP, duplicated pseudogenes; PSSD, processed (retrotransposed) pseudogenes; FRAG, fragmented pseudogenes.
