# Supplementary material for: Genome Sequencing and Comparative Transcriptomics of the Model Entomopathogenic Fungi Metarhizium anisopliae and M. acridum
Source: PLOS journal article supplement (doi:10.1371/journal.pgen.1001264), 2011-01-06
Supplement: S11 (10.1371/journal.pgen.1001264.s011) [file journal.pgen.1001264.s011]

**Table S5** Expanded (highlighted in green) and contracted (highlighted in yellow) protein families in *Metarhizium anisopliae* and *M. acridium*.

| ***M. anisopliae*** | ***M. acridum*** | ***E. festucae*** | ***P* value** | **Protein family with conserved domain** |
| --- | --- | --- | --- | --- |
| 269 | 236 | 121 | 0.001 | Major facilitator superfamily |
| 202 | 174 | 107 | 0 | Zn2/Cys6 |
| 179 | 153 | 95 | 0.001 | Fungal transcriptional regulatory protein, N-terminal |
| 86 | 53 | 45 | 0 | C2H2 zinc finger |
| 148 | 20 | 11 | 0 | transposase |
| 123 | 100 | 57 | 0 | Cytochrome P450 |
| 111 | 84 | 42 | 0 | NAD(P)-binding domain |
| 102 | 73 | 25 | 0 | Ankyrin |
| 61 | 42 | 25 | 0 | Secondary metabolite backbone genes |
| 55 | 43 | 19 | 0 | Peptidase S8 and S53, subtilisin |
| 55 | 42 | 27 | 0 | Dioxygenase |
| 54 | 40 | 20 | 0 | PTH11-like receptors |
| 51 | 45 | 24 | 0.004 | Alcohol dehydrogenase superfamily |
| 40 | 36 | 21 | 0.027 | Acyl-CoA N-acyltransferase |
| 36 | 25 | 6 | 0 | Heterokaryon incompatibility |
| 34 | 24 | 18 | 0.027 | Beta-ketoacyl synthase |
| 33 | 24 | 8 | 0 | Peptidase aspartic, catalytic |
| 32 | 17 | 4 | 0 | Peptidase, trypsin-like serine and cysteine |
| 32 | 23 | 20 | 0.015 | lipase |
| 30 | 23 | 6 | 0 | Monooxygenase |
| 30 | 21 | 11 | 0 | Glycosyl hydrolase family 18 |
| 28 | 22 | 11 | 0.011 | FAD-binding, type 2 |
| 26 | 20 | 12 | 0.047 | Aldolase-type TIM barrel |
| 24 | 13 | 11 | 0.012 | Polyketide synthetase |
| 18 | 16 | 5 | 0.021 | Glycosyl hydrolase family 16 |
| 17 | 14 | 3 | 0 | Beta-lactamase-like |
| 17 | 13 | 6 | 0.024 | Glucose-methanol-choline oxidoreductase |
| 14 | 6 | 6 | 0.002 | Amine oxidase |
| 14 | 11 | 2 | 0.001 | Cupin, Rml C-type |
| 11 | 6 | 1 | 0.001 | Protein-arginine deiminase |
| 10 | 8 | 1 | 0.001 | RTA1 like protein |
| 10 | 7 | 3 | 0.049 | Phytanoyl-CoA dioxygenase |
| 7 | 2 | 4 | 0.013 | DNA helicase, ATP-dependent, RecQ type |
| 7 | 3 | 0 | 0 | Fumarate reductase/succinate dehydrogenase |
| 6 | 5 | 1 | 0.021 | Amidohydrolase 1 |
| 6 | 1 | 3 | 0.003 | Male sterility, NAD-binding |
| 6 | 1 | 0 | 0 | Heat-labile enterotoxin, A chain |
| 6 | 1 | 0 | 0 | Glyoxalase/bleomycin resistance protein/dioxygenase |
| 5 | 4 | 1 | 0.049 | Killer toxin, Kp4/SMK-like, core |
| 5 | 1 | 1 | 0 | NRPS/PKS HYBRID |
| 4 | 1 | 5 | 0.01 | Fatty acid desaturase, type 1 |
| 4 | 1 | 1 | 0.039 | SCP-like extracellular |
| 1 | 4 | 1 | 0.012 | class IV aminotransferase |
| 161 | 192 | 171 | 0.006 | Protein kinases |
| 16 | 18 | 1 | 0 | Beta-lactamase-type transpeptidase |

Note: The protein family dataset of *Epichloë festucae* was used as a reference for analysis.
