# Supplementary material for: Genome Sequencing and Comparative Transcriptomics of the Model Entomopathogenic Fungi Metarhizium anisopliae and M. acridum
Source: PLOS journal article supplement (doi:10.1371/journal.pgen.1001264), 2011-01-06
Supplement: S14 (10.1371/journal.pgen.1001264.s014) [file journal.pgen.1001264.s014]

**Table S8** Subtilisin proteases encoded in *Metarhizium anisopliae* and *M. acridum* genomes, arranged by MEROPS family.

| **MEROPS family** | ***M. anisopliae*** | ***M. acridum*** |
| --- | --- | --- |
| S08.012 | MAA_01070 | MAC_08968 |
| S08.024 | MAA_08206 | MAC_00269 |
| S08.044 | MAA_09525 | MAC_08469 |
| S08.055 | MAA_02408 | MAC_01571 |
| S08.066 | MAA_10377 | MAC_08676 |
| S08.070 | MAA_05263 | MAC_02797 |
| S08.030(1) | MAA_06750 |  |
| S08.030(2) | MAA_09615 | MAC_05857 |
| S08.036 | MAA_00006 |  |
| S08.052(1) | MAA_00482 |  |
| S08.052(2) | MAA_10260 | MAC_04385 |
| S08.053(1) | MAA_03280 | MAC_06848 |
| S08.053(2) | MAA_03281 |  |
| S08.053(3) | MAA_07495 |  |
| S08.053(4) | MAA_07743 |  |
| S08.053(5) | MAA_07827 | MAC_04507 |
| S08.053(6) | MAA_08718 | MAC_08600 |
| S08.053(7) |  | MAC_08929 |
| S08.056(1) | MAA_03189 | MAC_08033 |
| S08.056(2) | MAA_08168 | MAC_09005 |
| S08.056(3) | MAA_08257 | MAC_00777 |
| S08.056(4) | MAA_08701 | MAC_05736 |
| S08.056(5) | MAA_09712 |  |
| S08.056(6) |  | MAC_01059 |
| S08.061(1) | MAA_08333 | MAC_09591 |
| S08.061(2) | MAA_09636 | MAC_05142 |
| S08.061(3) |  | MAC_06840 |
| S08.120(1) | MAA_07748 | MAC_05383 |
| S08.120(2) | MAA_09898 |  |
| S08.120(3) | MAA_10246 | MAC_08984 |
| S08.123(1) | MAA_03191 |  |
| S08.123(2) | MAA_10294 | MAC_09765 |
| S08.130 | MAA_06116 |  |
| S08.131(1) | MAA_04399 |  |
| S08.131(2) |  | MAC_02154 |
| S08.131(3) |  | MAC_06182 |
| S08.137 | MAA_08089 |  |
| S08.139(1) | MAA_00492 | MAC_07470 |
| S08.139(2) | MAA_01359 |  |
| S08.139(3) | MAA_04557 | MAC_04664 |
| S08.139(4) | MAA_04775 |  |
| S08.139(5) | MAA_06615 | MAC_06128 |
| S08.139(6) | MAA_08499 | MAC_09702 |
| S08.139(7) | MAA_08555 | MAC_05708 |
| S08.139(8) | MAA_08599 |  |
| S08.139(9) | MAA_08662 |  |
| S08.139(10) | MAA_09230 |  |
| S08.139(11) | MAA_09440 |  |
| S08.139(12) | MAA_09523 |  |
| S08.139(13) | MAA_10425 |  |
| S08.139(14) |  | MAC_02972 |
| S08.139(15) |  | MAC_05411 |
| S08.139(16) |  | MAC_05790 |
| S08.139(17) |  | MAC_08855 |
| S08.141 | MAA_01072 |  |
| S53.007(1) | MAA_01308 | MAC_06811 |
| S53.007(2) | MAA_01699 | MAC_02922 |
| S53.007(3) | MAA_03336 | MAC_08828 |
| S53.007(4) | MAA_04783 | MAC_02025 |
| S53.010(1) | MAA_03124 | MAC_09229 |
| S53.010(2) | MAA_05542 | MAC_01195 |
| S53.010(3) | MAA_07266 | MAC_00543 |
| S53.010(4) | MAA_07727 |  |
| S53.010(5) | MAA_08535 | MAC_09152 |
| S53.010(6) |  | MAC_02950 |

Note: The sequential numbers were arbitrarily assigned and used in the phylogenetic analysis (Figure 5B) to label subtilisins in the same subfamily. Orthologous sequences are aligned in the same rows.
