# Supplementary material for: Genome Sequencing and Comparative Transcriptomics of the Model Entomopathogenic Fungi Metarhizium anisopliae and M. acridum
Source: PLOS journal article supplement (doi:10.1371/journal.pgen.1001264), 2011-01-06
Supplement: S15 (10.1371/journal.pgen.1001264.s015) [file journal.pgen.1001264.s015]

**Table S9** Aspartyl proteases encoded in *Metarhizium anisopliae* and *M. acridum* genomes, arranged by MEROPS family.

| **MEROPS family** | ***M. anisopliae*** | ***M. acridum*** |
| --- | --- | --- |
| A01.017 | MAA_01430 | MAC_04049 |
| A01.017 | MAA_07151 | MAC_06320 |
| A01.017 | MAA_10118 |  |
| A01.018 | MAA_04936 | MAC_01466 |
| A01.019 | MAA_09777 |  |
| A01.027 | MAA_08226 |  |
| A01.027 | MAA_08308 | MAC_01391 |
| A01.027 | MAA_10199 |  |
| A01.027 |  | MAC_09505 |
| A01.044 | MAA_02596 | MAC_03590 |
| A01.058 | MAA_05619 | MAC_01114 |
| A01.065 | MAA_03540 | MAC_05040 |
| A01.066 | MAA_05188 | MAC_05521 |
| A01.077 | MAA_05386 | MAC_01809 |
| A01.078 | MAA_09694 | MAC_08904 |
| A01.079 | MAA_05546 | MAC_01190 |
| A01.081 | MAA_05346 | MAC_01849 |
| A01.082 | MAA_01514 | MAC_02106 |
| A01.082 | MAA_02438 | MAC_01602 |
| A01.082 | MAA_03778 | MAC_00985 |
| A01.082 | MAA_06705 | MAC_05713 |
| A01.082 | MAA_07296 |  |
| A01.082 | MAA_07527 |  |
| A01.082 | MAA_08419 | MAC_08955 |
| A01.082 | MAA_08632 |  |
| A01.082 | MAA_09099 | MAC_04877 |
| A01.082 |  | MAC_01392 |
| A01.UNA | MAA_01179 |  |
| A01.UNA | MAA_01236 | MAC_07757 |
| A01.UNA | MAA_08521 |  |
| A01.UPA | MAA_00575 |  |
| A01.UPA | MAA_03263 | MAC_09097 |
| A01.UPA | MAA_09088 | MAC_04887 |
| A01.UPA | MAA_10101 | MAC_02801 |
| A01.UPA | MAA_10212 | MAC_06622 |

Note: Orthologous sequences are aligned in the same rows.
