# Supplementary material for: Genome Sequencing and Comparative Transcriptomics of the Model Entomopathogenic Fungi Metarhizium anisopliae and M. acridum
Source: PLOS journal article supplement (doi:10.1371/journal.pgen.1001264), 2011-01-06
Supplement: S17 (10.1371/journal.pgen.1001264.s017) [file journal.pgen.1001264.s017]

**Table S11** Identification of genes coding for membrane transporters in *Metarhizium anisopliae* and *M. acridum*.

| **Transporter Classification** | **MAA** | **MAC** |
| --- | --- | --- |
| **1.A. α-Type channels** | **21** | **20** |
| 1.A.1. The Voltage-gated Ion Channel (VIC) Superfamily | 3 | 3 |
| 1.A.8. The Major Intrinsic Protein (MIP) Family | 4 | 4 |
| 1.A.11. The Ammonia Transporter Channel (Amt) Family | 2 | 2 |
| 1.A.35. The CorA Metal Ion Transporter (MIT) Family | 5 | 6 |
| 1.A.4. The Transient Receptor Potential Ca2+ Channel (TRP-CC) Family | 2 | 2 |
| 1.A.56. The Copper Transporter (Ctr) Family | 5 | 3 |
| **1.B. β-Barrel porins** | **1** | **1** |
| 1.B.8. The Mitochondrial and Plastid Porin (MPP) Family | 1 | 1 |
| **2.A. Porters (uniporters, symporters, antiporters)** | **371** | **338** |
| 2.A.1. The Major Facilitator Superfamily (MFS) | 269 | 236 |
| 2.A.2. The Glycoside-Pentoside-Hexuronide (GPH):Cation Symporter Family | 2 | 2 |
| 2.A.3. The Amino Acid-Polyamine-Organocation (APC) Family | 40 | 40 |
| 2.A.7. The Drug/Metabolite Transporter (DMT) Superfamily | 5 | 5 |
| 2.A.16. The Telurite-resistance/Dicarboxylate Transporter (TDT) Family | 3 | 2 |
| 2.A.18. The Amino Acid/Auxin Permease (AAAP) Family | 14 | 14 |
| 2.A.20. The Inorganic Phosphate Transporter (PiT) Family | 4 | 4 |
| 2.A.31. The Anion Exchanger (AE) Family | 2 | 2 |
| 2.A.38. The K+ Transporter (Trk) Family | 4 | 4 |
| 2.A.41. The Concentrative Nucleoside Transporter (CNT) Family | 1 | 1 |
| 2.A.44. The Formate-Nitrite Transporter (FNT) Family | 1 | 0 |
| 2.A.49. The Chloride Carrier/Channel (ClC) Family | 1 | 1 |
| 2.A.51. The Chromate Ion Transporter (CHR) Family | 1 | 1 |
| 2.A.52. The Ni2+-Co2+ Transporter (NiCoT) Family | 1 | 1 |
| 2.A.53. The Sulfate Permease (SulP) Family | 6 | 6 |
| 2.A.57. The Equilibrative Nucleoside Transporter (ENT) Family | 1 | 1 |
| 2.A.67. The Oligopeptide Transporter (OPT) Family | 15 | 17 |
| 2.A.77. The Cadmium Resistance (CadD) Family | 1 | 1 |
| **3.A. P-P-bond-hydrolysis-driven transporters** | **83** | **71** |
| 3.A.1. The ATP-binding Cassette (ABC) Superfamily | 56 | 51 |
| 3.A.3. The P-type ATPase (P-ATPase) Superfamily | 23 | 19 |
| 3.A.8. The Mitochondrial Protein Translocase (MPT) Family | 2 | 2 |
| 3.A.19. The TMS Recognition/Insertion Complex (TRC) Family | 1 | 1 |
| **8.A. Auxiliary transport proteins** | **1** | **1** |
| 8.A.5. The Voltage-gated K+ Channel β-subunit (Kvβ) Family | 1 | 1 |
| **9.A. Recognized transporters of unknown biochemical mechanism** | **8** | **8** |
| 9.A.14. The Nuclear Pore Complex (NPC) Family | 8 | 8 |
| **Total** | **484** | **441** |
