# Supplementary material for: Genome Sequencing and Comparative Transcriptomics of the Model Entomopathogenic Fungi Metarhizium anisopliae and M. acridum
Source: PLOS journal article supplement (doi:10.1371/journal.pgen.1001264), 2011-01-06
Supplement: S19 (10.1371/journal.pgen.1001264.s019) [file journal.pgen.1001264.s019]

**Table S13 The number of core genes involved in the biosynthesis of secondary metabolites in different fungi.**

| **Pathway** | **MAA** | **MAC** | **EF** | **FG** | **NC** | **MO** | **BC** | **SS** | **AN** | **AF** |
| --- | --- | --- | --- | --- | --- | --- | --- | --- | --- | --- |
| DMAT | 5 | 3 | 4 | 0 | 1 | 3 | 1 | 1 | 6 | 7 |
| HYBRID | 5 | 1 | 1 | 1 | 0 | 3 | 0 | 0 | 1 | 1 |
| NRPS | 14 | 13 | 18 | 10 | 3 | 5 | 6 | 5 | 11 | 13 |
| NRPS-like | 9 | 8 | 9 | 11 | 3 | 6 | 8 | 5 | 12 | 5 |
| PKS | 24 | 13 | 11 | 14 | 6 | 12 | 16 | 16 | 24 | 13 |
| PKS-like | 3 | 4 | 3 | 1 | 2 | 3 | 6 | 2 | 4 | 1 |
| **Clusters** | 51 | 30 | 26 | 26 | 12 | 24 | 31 | 25 | 46 | 28 |

Note: DMAT, Dimethylallyl tryptophan synthase; NRPS, non-ribosomal peptide synthetase; PKS, polyketide synthetase; HYBRID, hybrid PKS–NRPS enzyme. The species: MAA, *Metarhizium anisopliae*; MAC, *M. acridum*; EF, *Epichloë festucae*; FG, *Fusarium graminearum*; MO, *Magnaporthe oryzae*; BC, *Botrytis cinerea*; SS, *Sclerotinia sclerotiorum*; NC, *Neurospora crassa*; AN, *Aspergillus nidulans* and AF, *A. fumigatus*.
