# Supplementary material for: Genome Sequencing and Comparative Transcriptomics of the Model Entomopathogenic Fungi Metarhizium anisopliae and M. acridum
Source: PLOS journal article supplement (doi:10.1371/journal.pgen.1001264), 2011-01-06
Supplement: S21 (10.1371/journal.pgen.1001264.s021) [file journal.pgen.1001264.s021]

**Table S15** The number of genes coding for protein kinases in *Metarhizium anisopliae* and *M. acridum*, arranged by class.

| **Kinase Classification** | ***M. anisopliae*** | ***M. acridum*** |
| --- | --- | --- |
| AGC (protein kinase A, G and C group) | 21 | 19 |
| Atypical kinases (HisK) | 11 | 11 |
| CAMK(Calcium/Calmodulin regulated kinases) | 23 | 31 |
| CK1 (Casein Kinase 1 group) | 3 | 6 |
| CMGC (CDK, MAPK, GSK3 and CLK kinases)* | 45 | 61 |
| STE (MAP Kinase cascade kinases) | 22 | 21 |
| TKL (Tyrosine Kinase-like group) | 11 | 11 |
| Other | 25 | 32 |
| **Total** | **161** | **192** |

Note: HisK, histidine kinase; CAMK, calcium/calmodulin regulated kinases; CMGC, cyclin dependent kinases, mitogen activated protein kinases, glycogen synthase 3 kinases and cell division control kinases; CDK, cyclin dependent kinase; MAPK, mitogen-activated protein kinase; GSK3, gycogen synthase 3 kinase; CLK, CDC-like kinase.
