# Supplementary material for: Genome Sequencing and Comparative Transcriptomics of the Model Entomopathogenic Fungi Metarhizium anisopliae and M. acridum
Source: PLOS journal article supplement (doi:10.1371/journal.pgen.1001264), 2011-01-06
Supplement: S22 (10.1371/journal.pgen.1001264.s022) [file journal.pgen.1001264.s022]

**Table S16** Classification of conserved domains retained in the pseudogenes of *Metarhizium anisopliae* and *M. acridum*.

| **Conserved domains** | ***M. anisopliae*** | ***M. acridum*** |
| --- | --- | --- |
| Protein kinase-like domain | 23 | 39 |
| MFS general substrate transporter | 6 | 14 |
| Trypsin-like protease | 6 | 0 |
| hAT transposase | 5 | 0 |
| Cytochrome P450 | 4 | 3 |
| Fungal transcriptional factor | 4 | 3 |
| Zinc finger, C2H2-like | 4 | 1 |
| FAD-binding, type 2 | 3 | 1 |
| Fungal specific transcription factor | 3 | 3 |
| Histone H2B | 3 | 0 |
| Zinc finger, CCCH-type | 3 | 5 |
| Alcohol dehydrogenase superfamily | 2 | 2 |
| Carbohydrate-binding domain | 2 | 1 |
| Heterokaryon incompatibility | 2 | 0 |
| Metallophosphoesterase | 2 | 0 |
| Ras small GTPase | 2 | 0 |
| Serine/threonine-protein kinase domain | 2 | 1 |
| Short-chain dehydrogenase/reductase | 2 | 4 |
| Peptidase S8/S53, subtilisin/kexin/sedolisin | 2 | 1 |
| Peptidase aspartic, catalytic | 2 | 0 |
