# Supplementary material for: Genome Sequencing and Comparative Transcriptomics of the Model Entomopathogenic Fungi Metarhizium anisopliae and M. acridum
Source: PLOS journal article supplement (doi:10.1371/journal.pgen.1001264), 2011-01-06
Supplement: S26 (10.1371/journal.pgen.1001264.s026) [file journal.pgen.1001264.s026]

**Table S20** Differential expression of genes involved in signal transduction.

| **Class** | **Orthologous genes** | | **Protein family** | **MAA_CO**  **TPM** | | **MAA_LO**  **TPM** | **MAC_CO**  **TPM** | **MAC_LO**  **TPM** |
| --- | --- | --- | --- | --- | --- | --- | --- | --- |
| **G-protein coupled receptors** | MAA_06268 | MAC_06698 | SF1 subfamily of pth11-like receptor | 261.9 | | 259.2 | 35.7 | 59.7 |
| MAA_07310 | MAC_00494 | SF3 subfamily of pth11-like receptor | 34.2 | | 26.4 | 69.8 | 119.4 |
| MAA_01967 | MAC_03366 | SF5 subfamily of pth11-like receptor | 59.4 | | 107.5 | 147 | 91 |
| MAA_07166 | MAC_06334 | SF4 subfamily of pth11-like receptor | 63.7 | | 112.1 | 0.8 | 0 |
| MAA_06947 | MAC_02236 | SF5 subfamily of pth11-like receptor | 87.7 | | 106.7 | 0 | 0 |
| MAA_08688 | MAC_05731 | SF1 subfamily of pth11-like receptor | 15.7 | | 29.5 | 89.1 | 92 |
| MAA_03429 | MAC_02501 | STM1-like receptor | 328.4 | | 227.9 | 1175 | 478.8 |
| **Protein kinases** | MAA_05126 | MAC_08084 | Extracellular signal-regulated protein kinase | 251.1 | | 666.6 | 323.1 | 472.2 |
| MAA_09161 | MAC_05988 | Cyclin dependent kinase | 81.9 | | 120.4 | 122.8 | 238.1 |
| MAA_05823 | MAC_03153 | MAP kinase kinase kinase kinase | 75.1 | | 76.8 | 74.7 | 172.5 |
| MAA_04583 | MAC_04640 | MAP kinase kinase kinase | 49.6 | | 59.4 | 46 | 139 |
| MAA_05742 | MAC_09261 | Calcium/Calmodulin regulated kinase | 250.2 | | 156 | 112.5 | 86.6 |
| MAA_04421 | MAC_02314 | MAP kinase kinase | 15.1 | | 23.5 | 35.7 | 84.2 |
| MAA_07427 | MAC_00809 | Protein kinase A | 43.4 | | 55.1 | 136.7 | 61.8 |
| MAA_05230 | MAC_05477 | Calcium/Calmodulin regulated kinase | 72.6 | | 113.8 | 62 | 80.3 |
| MAA_07035 | MAC_03999 | Protein kinase C | 110.2 | | 107.8 | 54.6 | 45.9 |
| **PLC** | MAA_07090 | MAC_07174 | Phosphatidyl inositol-specific phospholipase C | 132.7 | | 164.3 | 10.3 | 146.3 |
| **AC** | MAA_07239 | MAC_00568 | Adenylate cyclase | 11.1 | | 10.9 | 37.6 | 24.5 |
| **Small GTPase** | MAA_01489 | MAC_03924 | Ras type | | 153.6 | 176.9 | 80.1 | 150.2 |
| MAA_02645 | MAC_03542 | Rab type | | 147.4 | 137.1 | 126 | 95.1 |
| MAA_05329 | MAC_08039 | Rab type | | 116 | 132.5 | 114.6 | 129.1 |
| MAA_05388 | MAC_01807 | Rho type | | 84.6 | 131.9 | 242.6 | 375.4 |
| MAA_00760 | MAC_07272 | Ras type | | 93 | 125.3 | 39 | 27.4 |
| MAA_02737 | MAC_08169 | Ras type | | 114.5 | 121.9 | 85.8 | 96.1 |
| MAA_03762 | MAC_07582 | Ras type | | 137 | 112.1 | 34.5 | 24.8 |
| MAA_09983 | MAC_05107 | GTPase activating protein RAP | | 13.23 | 9.46 | 29.97 | 38.83 |
| **G proteins** | MAA_03488 | MAC_04984 | G protein alpha subunit | | 141.3 | 172 | 199.6 | 167.9 |
| MAA_05124 | MAC_08082 | G-protein alpha subunit | | 7.7 | 5.5 | 4.5 | 3 |
| MAA_05603 | MAC_01131 | G protein alpha subunit | | 8 | 7.7 | 18.9 | 28.9 |
| MAA_04988 | MAC_05551 | G protein alpha subunit | | 23.7 | 15.7 | 20.5 | 37.1 |
| MAA_02470 | MAC_01638 | G protein beta subunit | | 25.5 | 11.2 | 20.5 | 29.1 |
| MAA_05991 | MAC_08659 | G protein gamma subunit | | 26.8 | 13.2 | 12.3 | 8.7 |
| **Transcription factor** | MAA_02048 | MAC_02758 | basic leucine zipper (bZIP) | | 577.69 | 1011.56 | 1033.38 | 1073.52 |
| MAA_01771 | MAC_00080 | C2H2 zinc finger | | 416.11 | 243.14 | 651.56 | 593.3 |
| MAA_05293 | MAC_09122 | C2H2 zinc finger | | 497.67 | 641.97 | 637.6 | 290.22 |
| MAA_08991 | MAC_06594 | Zn2Cys6 | | 383.48 | 393.67 | 61.17 | 89.54 |
| MAA_06444 | MAC_08433 | C2H2 zinc finger | | 353.94 | 356.97 | 622.41 | 214.27 |
| MAA_01736 | MAC_05774 | basic leucine zipper (bZIP) | | 347.47 | 273.82 | 619.95 | 299.93 |
| MAA_09445 | MAC_08402 | Zn2Cys6 | | 315.47 | 545.92 | 364.99 | 597.18 |
| MAA_05929 | MAC_00598 | C2H2 zinc finger | | 302.23 | 479.4 | 343.23 | 434.6 |
| MAA_04310 | MAC_03215 | HMG | | 300.69 | 189.52 | 222.52 | 159.91 |
| MAA_05009 | MAC_05572 | Zn2Cys6 | | 124.95 | 112.11 | 617.48 | 342.39 |
| MAA_06531 | MAC_00734 | C2H2 zinc finger | | 180.66 | 146.8 | 447.92 | 531.42 |
| MAA_02782 | MAC_04266 | Zn2Cys6 | | 156.96 | 150.82 | 423.7 | 316.91 |
| MAA_07457 | MAC_07492 | HMG | | 158.5 | 230.53 | 364.99 | 445.52 |

Note: MAA_CO and MAA_LO refer to transcripts expressed by *Metarhizium anisopliae* infecting locust and cockroach cuticles, respectively; MAC_CO and MAC_LO refer to transcripts expressed by *M. acridum* infecting locust and cockroach cuticles, respectively; TPM, transcripts per million.
